# Supplementary material for: Temporal and Spatial Transcriptional Fingerprints by Antipsychotic or Propsychotic Drugs in Mouse Brain
Source: PLoS One. 2015 Feb 18;10(2):e0118510. doi: 10.1371/journal.pone.0118510 (PMC4334909; doi:10.1371/journal.pone.0118510)
Supplement: S1 Table — (XLSX) [file pone.0118510.s002.xlsx]

## Sheet: S1 Table
	S1 Table. Mouse TaqMan primer, probe and oligo template sequences
		Gene	Accession number		Sequence 5’ - 3’
		c-fos	NM_010234	Sense primer	5’- AGCCTTTCCTACTACCATTCCC -3’
				Antisense primer	5’- GTTGGCACTAGAGACGGACAG -3’
				Probe	5’- CCGACTCCTTCTCCAGCATGGGCTCT -3’
				Oligo template	5’- GGGACAGCCTTTCCTACTACCATTCCCCAGCCGACTCCTTCTCCA
					GCATGGGCTCTCCTGTCAACACACAGGACTTTTGCGCAGATCTGTCC
					GTCTCTAGTGCCAACTTTAT -3’
		Arc	BC023127	Sense primer	5’- AGCTGAAGCCACAAATGCAG -3’
				Antisense primer	5’- CTGAGTCACGGAGCTGAGC -3’
				Probe	5’- AGACCTGACATCCTGGCACCTCCTGG -3’
				Oligo template	5’- GGGTGAGCTGAAGCCACAAATGCAGCTGAAGCAGCAGACCTGA
					CATCCTGGCACCTCCTGGCCCCCAGTGATTCATACCAGTGAAGAAG
					AGCAGAGCTCAGCTCCGTGACTCAGCCATG -3’
		Egr1	NM_007913	Sense primer	5’- CCCTATGAGCACCTGACCAC -3’
				Antisense primer	5’- AGGCAACCGAGTCGTTTGG -3’
				Probe	5’- AACTCGTCTCCACCATCGCCTTCTCA -3’
				Oligo template	5’- AACAACCCTATGAGCACCTGACCACAGAGTCCTTTTCTGACATCG
					CTCTGAATAATGAGAAGGCGATGGTGGAGACGAGTTATCCCAGCCA
					AACGACTCGGTTGCCTCCCAT -3’
		Egr2	NM_010118	Sense primer	5’- CTCGTCGGTGACCATCTTCC -3’
				Antisense primer	5’- TTCTCTCCAGTCATGTCAATGTTG -3’
				Probe	5’- TGCCATCTCCCGCCACTCCGTTCA -3’
				Oligo template	5’- GCCGCCTCGTCGGTGACCATCTTCCCCAATGGTGAACTGGGAGG
					CCCCTTTGACCAGATGAACGGAGTGGCGGGAGATGGCATGATCAA
					CATTGACATGACTGGAGAGAAGAGAC -3’
		Egr3	NM_018781	Sense primer	5’- CGCGCTCAACCTCTTCTCC -3’
				Antisense primer	5’- GGGCTTCTCGTTGGTCAGAC -3’
				Probe	5’- CAGCAGCGACTCGGTAGCCCATTACA -3’
				Oligo template	5’- CCCAGCGCGCTCAACCTCTTCTCCGGCAGCAGCGACTCGGTAGC
					CCATTACAATCAGATGGCTACAGAGAATGTGATGGACATCGGTCTGA
					CCAACGAGAAGCCCAATCC -3’
		Sgk1	NM_011361	Sense primer	5’- TATTGAGCATAACGGGACAACATC -3’
				Antisense primer	5’- GGCTGCTTATGGAGGACCTC -3’
				Probe	5’- TGGCACGCCTGAGTATCTGGCTCC -3’
				Oligo template	5’- GAGAATATTGAGCATAACGGGACAACATCTACCTTCTGTGGCAC
					GCCTGAGTATCTGGCTCCTGAGGTCCTCCATAAGCAGCCGTATG -3’
		Ccn1	NM_010516	Sense primer	5’- AATTGGAAAAGGCAGCTCACTG -3’
				Antisense primer	5’- CGTGCAGAGGGTTGAAAAGAAC -3’
				Probe	5’- TTCCTGTCTTTGGCACCGAACCGC -3’
				Oligo template	5’- ATCGCAATTGGAAAAGGCAGCTCACTGAAGAGGCTTCCTGTCTTT
					GGCACCGAACCGCGAGTTCTTTTCAACCCTCTGCACGCCCAT -3’
		Cyclophilin A	NM_008907	Sense primer	5’- GCCGATGACGAGCCCTTG -3’
				Antisense primer	5’- TAGCCAAATCCTTTCTCTCCAGTG -3’
				Probe	5’- CCGCGTCTCCTTCGAGCTGTTTGCA -3’
				Oligo template	5’- TCACGGCCGATGACGAGCCCTTGGGCCGCGTCTCCTTCGAGC
					TGTTTGCAGACAAAGTTCCAAAGACAGCAGAAAACTTTCGAGCTCTG
					AGCACTGGAGAGAAAGGATTTGGCTATAAGG -3’
