# Supplementary material for: Temporal and Spatial Transcriptional Fingerprints by Antipsychotic or Propsychotic Drugs in Mouse Brain
Source: PLoS One. 2015 Feb 18;10(2):e0118510. doi: 10.1371/journal.pone.0118510 (PMC4334909; doi:10.1371/journal.pone.0118510)
Supplement: S3 Table — Fold changes in gene expression, normalized to cyclophilin A (Ppia) and relative to the expression of their corresponding vehicle group at a dose of 0 mg/kg, are calculated for each sample. Data are mean± SEM., n = 5: #p<0.025, significantly different from vehicle in Williams’ test. Antipsychotics; haloperidol (1 hr treatment, 0.03 mg/kg to 1 mg/kg, p.o.), aripiprazole (2 hrs treatment, 0.1 mg/kg to 3 mg/kg, p.o.), olanzapine (1 hr treatment, 0.3 mg/kg to 10 mg/kg, p.o.) and clozapine (1 hr treatment, 1 mg/kg to 30 mg/kg, p.o.). (XLSX) [file pone.0118510.s004.xlsx]

## Sheet: S3 Table
	S3 Table. Fold changes of dose-response gene expression profiling by treatment of antipsychotic drugs.
	Prefrontal Cortex
		Haloperidol (1hr treatment, p.o.)														Aripiprazole (2hrs treatment, p.o.)														Olanzapine (1hr treatment, p.o.)														Clozapine (1hr treatment, p.o.)
	Conc (mg/kg)	0.03			0.1			0.3			1					0.1			0.3			1			3					0.3			1			3			10					1			3
	c-fos	0.898133	±	0.138405	0.733757	±	0.118619	0.978852	±	0.352858	1.03911	±	0.170509			0.813153	±	0.154443	0.778342	±	0.159335	0.695746	±	0.0712411	0.549262	±	0.0827347			0.900666	±	0.100071	0.870983	±	0.106971	0.941194	±	0.0642778	1.32669	±	0.129142			0.900945	±	0.170153	1.10642	±	0.160431
	Arc	0.80949	±	0.130472	0.529098	±	0.0482847	0.719145	±	0.18507	0.785234	±	0.0885214			0.702723	±	0.0611215	0.621825	±	0.0804025	0.623328	±	0.101997	0.436011	±	0.033169			0.751161	±	0.0994103	0.77721	±	0.0827791	0.741291	±	0.0490542	0.629433	±	0.0580243			0.574797	±	0.0813284	0.687643	±	0.086689
	Egr1	0.905192	±	0.129324	0.725167	±	0.0900447	0.879521	±	0.121068	0.782077	±	0.1214			0.865928	±	0.0770075	1.03453	±	0.066833	0.845276	±	0.0485451	0.753939	±	0.0611434			0.959426	±	0.0117136	0.938431	±	0.04951	0.854489	±	0.0341267	0.995919	±	0.0382896			0.973512	±	0.100269	1.16121	±	0.0512088
	Egr2	0.749107	±	0.190535	0.516682	±	0.108542	0.692354	±	0.193082	0.751149	±	0.194091			0.756565	±	0.141991	0.938947	±	0.185924	0.65384	±	0.0433387	0.592642	±	0.0701104			0.911924	±	0.0587404	0.805305	±	0.0648854	0.825827	±	0.0388285	1.00928	±	0.117887			1.00828	±	0.201406	1.26685	±	0.13004
	Egr3	0.943132	±	0.117179	0.859098	±	0.0655365	0.977282	±	0.037888	0.99432	±	0.0760151			0.869885	±	0.101607	1.07898	±	0.174505	0.958739	±	0.135164	0.818342	±	0.118975			0.857692	±	0.0178635	0.918011	±	0.138263	0.847429	±	0.0592501	0.86305	±	0.072181			0.883124	±	0.146158	0.886588	±	0.106709
	Sgk1	1.0226	±	0.107719	1.07895	±	0.0878109	1.1073	±	0.0695891	1.09132	±	0.0515909			1.07226	±	0.0748941	1.09293	±	0.0357262	1.19865	±	0.0833386	1.36404	±	0.0890667			0.968588	±	0.0922763	1.11244	±	0.0545921	1.2344	±	0.0789688	1.42645	±	0.109141			1.15485	±	0.0580088	1.30959	±	0.108327
	Ccn1	1.0425	±	0.106463	0.882316	±	0.0475515	1.06207	±	0.0872036	1.09446	±	0.170942			1.03051	±	0.0726738	1.04263	±	0.0368486	1.06941	±	0.104353	1.07795	±	0.0651367			1.06835	±	0.159224	1.15231	±	0.107398	1.25137	±	0.108837	1.80966	±	0.113897			1.12495	±	0.0925486	1.45309	±	0.190375
	Nucleus Accumbens
		Haloperidol (1hr treatment, p.o.)														Aripiprazole (2hrs treatment, p.o.)														Olanzapine (1hr treatment, p.o.)														Clozapine (1hr treatment, p.o.)
	Conc (mg/kg)	0.03			0.1			0.3			1					0.1			0.3			1			3					0.3			1			3			10					1			3
	c-fos	1.46368	±	0.21009	1.41679	±	0.209922	4.43523	±	0.912905	7.52927	±	0.759554			1.02413	±	0.177875	1.40324	±	0.162926	2.04605	±	0.310095	2.35857	±	0.376948			0.817495	±	0.140872	1.42865	±	0.0566304	2.13685	±	0.112966	2.74629	±	0.249321			0.765191	±	0.0933153	1.03158	±	0.124539
	Arc	1.24228	±	0.170103	1.14723	±	0.0655245	2.55121	±	0.449915	3.51946	±	0.264135			1.00856	±	0.122023	1.2395	±	0.098823	1.67972	±	0.138014	1.72591	±	0.313558			1.04744	±	0.0875204	1.34485	±	0.0949573	1.46529	±	0.156217	1.43746	±	0.12629			1.00717	±	0.082353	1.07089	±	0.0993621
	Egr1	1.16561	±	0.104055	1.21468	±	0.0674822	1.58626	±	0.171698	1.92669	±	0.138493			1.02736	±	0.0947968	1.03362	±	0.0569326	1.30992	±	0.0580922	1.30664	±	0.171983			0.986102	±	0.0744209	1.15235	±	0.0931871	1.18793	±	0.0694853	1.11185	±	0.0735387			0.830106	±	0.113937	0.79684	±	0.0657953
	Egr2	0.994223	±	0.162018	1.15184	±	0.124337	3.36418	±	0.69165	6.68574	±	1.16903			1.06083	±	0.176414	1.3829	±	0.217167	2.42804	±	0.324929	2.85277	±	0.507397			1.07654	±	0.0741224	1.54138	±	0.124895	2.09066	±	0.335376	2.4002	±	0.233625			0.940709	±	0.0927435	1.30669	±	0.0779296
	Egr3	1.04458	±	0.0890264	1.07099	±	0.0770185	1.23913	±	0.0882534	1.50503	±	0.0954194			0.981726	±	0.0998732	0.907464	±	0.0692512	1.10222	±	0.0678968	1.2366	±	0.150575			1.01852	±	0.0966435	1.13157	±	0.124854	1.13953	±	0.0459318	1.09574	±	0.0333505			0.904566	±	0.0448079	1.0284	±	0.0668253
	Sgk1	0.97196	±	0.110381	1.31544	±	0.105023	0.995609	±	0.0841592	1.24637	±	0.101145			1.35831	±	0.0721067	1.09614	±	0.101206	1.37339	±	0.0833518	1.28632	±	0.128172			0.918388	±	0.154708	1.24801	±	0.0407732	1.30125	±	0.0435102	1.38312	±	0.0352154			1.16609	±	0.136968	1.56288	±	0.122557
	Ccn1	0.946351	±	0.0682483	0.875817	±	0.0984769	1.01483	±	0.0495564	1.05152	±	0.0514995			1.16331	±	0.0441607	1.07666	±	0.0647322	1.20595	±	0.10184	1.22888	±	0.0827752			0.922312	±	0.183416	0.968765	±	0.0322498	1.25611	±	0.0472631	1.53259	±	0.0512345			0.834526	±	0.155661	0.955632	±	0.0655299
	Striatum
		Haloperidol (1hr treatment, p.o.)														Aripiprazole (2hrs treatment, p.o.)														Olanzapine (1hr treatment, p.o.)														Clozapine (1hr treatment, p.o.)
	Conc (mg/kg)	0.03			0.1			0.3			1					0.1			0.3			1			3					0.3			1			3			10					1			3
	c-fos	1.78154	±	0.402183	1.6375	±	0.249216	9.94099	±	1.59258	20.8589	±	4.16715			1.10994	±	0.160444	2.40669	±	0.401089	4.75056	±	0.6125	5.48718	±	0.40216			1.12357	±	0.161305	3.34869	±	0.228079	6.2698	±	1.03748	11.5146	±	1.04315			0.91697	±	0.125436	0.919319	±	0.0579044
	Arc	1.36857	±	0.340054	1.03336	±	0.0981703	2.91209	±	0.532695	5.10778	±	1.33638			0.949038	±	0.0622322	1.62003	±	0.197206	2.13232	±	0.154679	2.49368	±	0.23563			1.02098	±	0.0670131	1.76087	±	0.158411	2.19874	±	0.369189	2.47846	±	0.21828			1.03978	±	0.0763467	0.890279	±	0.0609351
	Egr1	1.31733	±	0.277764	1.13506	±	0.0558003	1.63623	±	0.198008	2.42115	±	0.427835			0.892593	±	0.106744	1.28621	±	0.102206	1.43075	±	0.0360095	1.58416	±	0.0908348			0.924649	±	0.00871386	1.23515	±	0.0758972	1.38774	±	0.0913798	1.36422	±	0.0618089			0.93761	±	0.0710324	0.991552	±	0.0311063
	Egr2	1.25195	±	0.278821	1.40029	±	0.202235	3.43431	±	0.605616	8.14429	±	1.80411			1.10284	±	0.120755	2.10708	±	0.414688	3.08255	±	0.233568	3.85567	±	0.218059			1.10122	±	0.118817	2.31313	±	0.0912163	3.37455	±	0.550752	4.52557	±	0.380421			1.40382	±	0.230322	1.08807	±	0.118845
	Egr3	1.25595	±	0.251514	1.20448	±	0.123848	1.22643	±	0.15675	1.57566	±	0.307941			0.904658	±	0.0494398	1.09185	±	0.0951301	1.15291	±	0.0361298	1.2609	±	0.062458			0.901918	±	0.103549	1.03299	±	0.159206	1.19993	±	0.0779192	1	±	0.114506			0.971343	±	0.176683	0.898951	±	0.143438
	Sgk1	1.02904	±	0.133239	0.972385	±	0.0740281	0.882475	±	0.0693863	0.732141	±	0.15068			1.13944	±	0.0836782	1.00727	±	0.0433416	1.18903	±	0.110771	1.31896	±	0.0976265			0.930189	±	0.0851461	1.05234	±	0.0971521	1.3219	±	0.0528051	1.17402	±	0.0882309			0.973318	±	0.169569	1.35664	±	0.143062
	Ccn1	1.27883	±	0.108253	1.17167	±	0.044753	1.25418	±	0.116407	1.19403	±	0.176877			0.973007	±	0.0442612	1.08085	±	0.0355531	1.09098	±	0.0628601	1.10116	±	0.0316045			0.911776	±	0.0991247	0.997261	±	0.106801	1.12766	±	0.112672	1.54256	±	0.164365			1.13414	±	0.149649	1.48261	±	0.196248
	Hippocampus
		Haloperidol (1hr treatment, p.o.)														Aripiprazole (2hrs treatment, p.o.)														Olanzapine (1hr treatment, p.o.)														Clozapine (1hr treatment, p.o.)
	Conc (mg/kg)	0.03			0.1			0.3			1					0.1			0.3			1			3					0.3			1			3			10					1			3
	c-fos	0.957962	±	0.132527	0.749844	±	0.0707357	0.731995	±	0.105449	0.938897	±	0.11725			0.732789	±	0.0563715	0.837276	±	0.0916412	0.730893	±	0.0683062	0.770953	±	0.0838853			0.711343	±	0.127324	0.817389	±	0.0941986	0.769494	±	0.052069	1.10149	±	0.0929526			0.722552	±	0.08011	0.844486	±	0.105572
	Arc	0.688089	±	0.0413809	0.616798	±	0.0179985	0.772592	±	0.0962315	0.746134	±	0.0714317			0.925562	±	0.0532316	0.930127	±	0.109743	0.89266	±	0.0442084	0.910865	±	0.067368			0.757767	±	0.0695848	0.835058	±	0.0574074	0.84364	±	0.0962653	0.717433	±	0.0513272			0.605971	±	0.0618446	0.640085	±	0.0781541
	Egr1	0.75691	±	0.03256	0.778197	±	0.0228774	0.832219	±	0.0630813	0.650919	±	0.0414072			0.965575	±	0.0748155	1.03556	±	0.086756	0.892294	±	0.0402966	0.948918	±	0.0242973			0.881	±	0.0640478	0.988406	±	0.0483457	0.942452	±	0.0525099	1.05105	±	0.0457768			0.904833	±	0.0445739	1.01568	±	0.0889124
	Egr2	0.571337	±	0.0759478	0.664522	±	0.122877	0.941369	±	0.15057	1.07416	±	0.0754186			0.875002	±	0.0948608	0.879532	±	0.154721	0.758225	±	0.0798253	0.851739	±	0.0702563			0.654681	±	0.0679445	0.56081	±	0.0670139	0.719227	±	0.0333946	0.798003	±	0.0362412			0.971171	±	0.157534	0.705703	±	0.116544
	Egr3	0.71797	±	0.059385	0.742936	±	0.0613642	0.818438	±	0.0833294	0.734987	±	0.0677168			0.960695	±	0.0513614	0.981975	±	0.0567859	0.875978	±	0.0578447	0.958232	±	0.0595875			0.989776	±	0.068233	1.03443	±	0.0772412	1.02445	±	0.0475624	1.05927	±	0.0717881			0.873108	±	0.0608174	0.954299	±	0.0462507
	Sgk1	0.730963	±	0.0860706	0.839768	±	0.104412	0.778679	±	0.0944877	0.849883	±	0.109772			1.42179	±	0.166587	1.41196	±	0.126321	1.71245	±	0.117634	1.68325	±	0.16462			0.918117	±	0.248319	1.22657	±	0.0524988	1.178	±	0.113991	1.28005	±	0.115054			0.909161	±	0.0932172	1.40025	±	0.171376
	Ccn1	0.788192	±	0.0590556	0.858049	±	0.0729262	0.854574	±	0.134958	1.09962	±	0.172651			1.0274	±	0.0698199	1.01999	±	0.0740965	1.14627	±	0.102565	1.14212	±	0.0853151			0.880662	±	0.233259	0.899331	±	0.269193	0.784292	±	0.0809698	1.13007	±	0.152047			1.24589	±	0.440723	1.06986	±	0.272029
	Fold changes in gene expression, normalized to cyclophilin A (Ppia) and relative to the expression of their corresponding vehicle group at a dose of 0 mg/kg, are calculated for each sample. Data are mean± SEM., n= 5:
	#p<0.025, significantly different from vehicle in Williams’ test. Antipsychotics; haloperidol (1 hr treatment, 0.03 mg/kg to 1 mg/kg, p.o.), aripiprazole (2 hrs treatment, 0.1 mg/kg to 3 mg/kg, p.o.),
	olanzapine (1 hr treatment, 0.3 mg/kg to 10 mg/kg, p.o.) and clozapine (1 hr treatment, 1 mg/kg to 30 mg/kg, p.o.).
[truncated: 6 more columns]
