# Supplementary material for: Temporal and Spatial Transcriptional Fingerprints by Antipsychotic or Propsychotic Drugs in Mouse Brain
Source: PLoS One. 2015 Feb 18;10(2):e0118510. doi: 10.1371/journal.pone.0118510 (PMC4334909; doi:10.1371/journal.pone.0118510)
Supplement: S5 Table — Fold changes in gene expression, normalized to cyclophilin A (Ppia) and relative to the expression of their corresponding vehicle group at the same time point, are calculated for each sample. Data are mean± SEM., n = 5: *p<0.05, **p<0.01, significantly different from vehicle in unpaired t-test with Welch’s correction. Propsychotic agents; MAP (3 mg/kg, s.c.), PCP (10 mg/kg, s.c.) and MK-801 (1 mg/kg, s.c.). (XLSX) [file pone.0118510.s006.xlsx]

## Sheet: S5 Table
	S5 Table. Fold changes of time-course gene expression profiling by treatment of propsychotic drugs.
	Prefrontal Cortex
		MAP (3.0 mg/kg, s.c.)														PCP (10 mg/kg, s.c.)														MK-801 (1.0 mg/kg, s.c.)
	Time (min)	30			60			120			240					30			60			120			240					30			60			120			240
	c-fos	1.70967	±	0.116008	2.36083	±	0.195579	3.47385	±	0.108914	1.39372	±	0.24806			1.41	±	0.205352	2.07	±	0.148992	3.08	±	0.548128	2.12	±	0.197258			1.77098	±	0.249875	0.971729	±	0.0667081	1.62799	±	0.183175	1.57329	±	0.140254
	Arc	1.36715	±	0.256709	1.88754	±	0.253113	4.20967	±	0.40384	1.56929	±	0.260175			0.86	±	0.159056	0.77	±	0.113191	1.52	±	0.372839	1.15	±	0.104257			1.46062	±	0.300226	0.924414	±	0.0957238	1.63598	±	0.235678	0.975136	±	0.114481
	Egr1	1.00006	±	0.0948447	1.24809	±	0.0981391	1.52147	±	0.09078	1.3722	±	0.117245			0.98	±	0.1926	0.88	±	0.208328	0.9	±	0.174527	0.78	±	0.0853534			1.36601	±	0.219079	0.754698	±	0.0879979	0.75538	±	0.0537694	0.461168	±	0.0381533
	Egr2	1.20539	±	0.174305	1.887	±	0.226595	2.7966	±	0.210079	2.13553	±	0.403411			0.86	±	0.200304	1.02	±	0.167624	0.89	±	0.193433	0.78	±	0.148906			1.36423	±	0.361518	0.544139	±	0.0987353	0.579315	±	0.134413	0.262193	±	0.0268801
	Egr3	0.791345	±	0.0747029	1.07151	±	0.084562	1.14642	±	0.0603794	1.37643	±	0.125727			1.1	±	0.168868	0.97	±	0.163728	1.09	±	0.219024	1.13	±	0.0685327			1.2124	±	0.127757	0.944776	±	0.0397456	1.08266	±	0.116649	1.20385	±	0.0771092
	Sgk1	1.18631	±	0.0253482	1.11566	±	0.0862565	1.02736	±	0.0845736	0.921401	±	0.0416422			0.96	±	0.083658	1.18	±	0.111702	1.61	±	0.24843	1.26	±	0.121176			0.997467	±	0.0309199	1.1972	±	0.0960755	1.42517	±	0.134074	1.17724	±	0.0621549
	Ccn1	2.23985	±	0.143724	3.8572	±	0.608728	2.41374	±	0.242323	0.850131	±	0.0671048			1.82	±	0.194219	3.87	±	0.162364	3.22	±	0.310987	1.2	±	0.158965			2.58679	±	0.221313	2.52706	±	0.108669	3.14153	±	0.408308	1.42388	±	0.357722
	Nucleus Accumbens
		MAP (3.0 mg/kg, s.c.)														PCP (10 mg/kg, s.c.)														MK-801 (1.0 mg/kg, s.c.)
	Time (min)	30			60			120			240					30			60			120			240					30			60			120			240
	c-fos	4.16974	±	0.139295	4.3962	±	0.238161	5.35676	±	0.241214	1.10185	±	0.0693648			1.83	±	0.090215	3.53	±	0.369215	6.99	±	1.13279	2.7	±	0.2522			2.15014	±	0.285716	3.46779	±	0.27965	5.38229	±	0.493543	2.44926	±	0.61688
	Arc	2.40782	±	0.291939	1.92273	±	0.171946	2.79739	±	0.26281	1.22126	±	0.177337			0.89	±	0.0507283	0.98	±	0.124202	0.67	±	0.0776165	1.02	±	0.157578			0.742164	±	0.0913648	0.731121	±	0.15282	0.496251	±	0.0273414	0.675065	±	0.0721327
	Egr1	1.62844	±	0.121047	1.37262	±	0.13444	1.52061	±	0.090876	1.0462	±	0.105853			1.14	±	0.0728116	1.14	±	0.0760681	0.81	±	0.073814	0.83	±	0.103458			0.902058	±	0.0896998	0.817812	±	0.0613781	0.695373	±	0.0710039	0.721671	±	0.0704984
	Egr2	2.5892	±	0.204705	2.48762	±	0.340093	2.87555	±	0.361139	1.4171	±	0.199681			1.11	±	0.0850439	1.26	±	0.284287	0.49	±	0.0629247	0.88	±	0.154132			0.744761	±	0.119774	0.668981	±	0.162622	0.285839	±	0.0373332	0.532973	±	0.154105
	Egr3	1.28386	±	0.0749302	1.09876	±	0.128884	1.32375	±	0.0817536	1.23554	±	0.0828596			1.24	±	0.0957507	1.22	±	0.0951838	0.95	±	0.111016	0.67	±	0.0808599			0.873761	±	0.0549245	0.972326	±	0.0605954	0.916765	±	0.05984	0.951623	±	0.0802771
	Sgk1	1.17103	±	0.0814416	1.13504	±	0.149103	1.29269	±	0.143826	0.891786	±	0.0335314			1.5	±	0.119927	1.79	±	0.240728	1.82	±	0.0978207	1.53	±	0.111017			0.861214	±	0.0623775	1.25372	±	0.029499	2.10846	±	0.20215	1.76288	±	0.0979803
	Ccn1	2.01613	±	0.0695968	2.35637	±	0.288831	1.78867	±	0.0790932	0.967407	±	0.0509263			2.75	±	0.353763	4.37	±	0.829895	3.23	±	0.356112	1.29	±	0.315997			6.28742	±	0.672126	5.45634	±	0.89529	3.4581	±	0.224562	1.78075	±	0.226516
	Striatum
		MAP (3.0 mg/kg, s.c.)														PCP (10 mg/kg, s.c.)														MK-801 (1.0 mg/kg, s.c.)
	Time (min)	30			60			120			240					30			60			120			240					30			60			120			240
	c-fos	5.11075	±	0.436542	10.2772	±	0.991305	10.4734	±	1.7016	0.967683	±	0.217988			2	±	0.522774	2.09	±	0.46947	7.52	±	1.03664	3.74	±	0.51188			1.51	±	0.234909	1.59821	±	0.208643	2.92613	±	0.250176	1.61598	±	0.260971
	Arc	2.14575	±	0.228138	2.68325	±	0.399369	4.48227	±	0.383327	1.4556	±	0.207079			0.79	±	0.136547	0.46	±	0.0511394	0.51	±	0.0424292	0.9	±	0.125558			0.902092	±	0.12842	0.549205	±	0.0449933	0.569337	±	0.042559	0.578442	±	0.0442172
	Egr1	1.39823	±	0.158644	1.70893	±	0.144916	2.17522	±	0.19088	1.46056	±	0.221808			0.79	±	0.104547	0.68	±	0.0858025	0.7	±	0.114697	0.97	±	0.0693716			1.10523	±	0.104469	0.707669	±	0.0609508	0.634863	±	0.0294773	0.656605	±	0.018847
	Egr2	2.21712	±	0.223697	3.16381	±	0.450895	5.12229	±	0.99481	1.89639	±	0.461296			0.76	±	0.0867225	0.62	±	0.0703836	0.38	±	0.0566036	0.8	±	0.136942			0.958506	±	0.111723	0.648573	±	0.150921	0.266594	±	0.0544332	0.202506	±	0.0232994
	Egr3	0.984415	±	0.0989645	1.26617	±	0.127548	1.58544	±	0.148073	1.67643	±	0.24365			0.97	±	0.134643	0.79	±	0.108505	1.23	±	0.141561	1.1	±	0.18038			1.13073	±	0.105583	0.941452	±	0.0537021	1.03614	±	0.0944538	1.05212	±	0.0564672
	Sgk1	1.21266	±	0.068304	1.08878	±	0.116925	1.10182	±	0.0966762	1.12327	±	0.124932			1.14	±	0.122768	1.06	±	0.170699	1.98	±	0.18677	2.05	±	0.380906			1.05809	±	0.0961888	1.434	±	0.0785445	2.30579	±	0.230605	1.87461	±	0.224468
	Ccn1	1.41298	±	0.0709331	1.40838	±	0.0943142	1.38248	±	0.138358	1.18178	±	0.119275			2.52	±	0.503709	2.42	±	0.396996	2.14	±	0.244439	1.45	±	0.276027			3.54123	±	0.438306	2.90744	±	0.337437	2.85015	±	0.42206	1.43734	±	0.203449
	Hippocampus
		MAP (3.0 mg/kg, s.c.)														PCP (10 mg/kg, s.c.)														MK-801 (1.0 mg/kg, s.c.)
	Time (min)	30			60			120			240					30			60			120			240					30			60			120			240
	c-fos	2.08884	±	0.260505	3.98152	±	0.535264	3.99407	±	0.301531	1.5784	±	0.145378			4.15	±	0.496722	3.91	±	0.318359	3.58	±	0.637328	2.65	±	0.421798			3.2878	±	0.322376	4.59042	±	0.878543	2.86482	±	0.281288	2.0655	±	0.143413
	Arc	1.10988	±	0.0646988	1.62897	±	0.209	2.34488	±	0.372773	1.31011	±	0.120168			0.96	±	0.0634066	1.04	±	0.174689	1.28	±	0.23621	1.38	±	0.247641			1.00918	±	0.175785	1.09729	±	0.0671375	1.01491	±	0.183342	0.78915	±	0.0707701
	Egr1	1.14249	±	0.0975733	1.35739	±	0.0993264	1.27271	±	0.0806117	1.16149	±	0.0809266			1.15	±	0.0944401	1.1	±	0.180759	1.07	±	0.171594	1.18	±	0.156077			0.966782	±	0.0709869	0.965246	±	0.0724138	0.784416	±	0.0587079	0.525732	±	0.005309
	Egr2	1.26133	±	0.194484	2.26859	±	0.404116	3.57474	±	0.559591	1.54224	±	0.210492			1.33	±	0.144128	1.49	±	0.362916	1.83	±	0.288488	1.38	±	0.193953			1.28792	±	0.127715	1.52466	±	0.268461	0.688429	±	0.0495045	0.654914	±	0.0747019
	Egr3	0.91588	±	0.0427126	0.98098	±	0.0758527	1.14558	±	0.0295279	1.10598	±	0.0506566			1.07	±	0.0860646	1.05	±	0.191084	0.99	±	0.131128	1.42	±	0.184835			0.863201	±	0.0498621	0.962543	±	0.0327714	1.16046	±	0.0809089	1.07185	±	0.0753257
	Sgk1	1.11507	±	0.102223	1.26131	±	0.142005	1.41633	±	0.17674	0.999682	±	0.142322			1.29	±	0.117811	1.57	±	0.12763	1.9	±	0.181268	1.7	±	0.226815			0.97202	±	0.0636869	1.55751	±	0.189317	2.17463	±	0.157813	1.63122	±	0.17274
	Ccn1	2.55516	±	0.299617	3.77617	±	0.521616	2.61918	±	0.295778	0.836681	±	0.0533944			3.52	±	0.226627	5.08	±	0.313971	4.32	±	1.02314	1.28	±	0.204243			4.73301	±	0.528795	10.6044	±	1.82928	4.34268	±	0.750646	1.76521	±	0.356821
	Fold changes in gene expression, normalized to cyclophilin A (Ppia) and relative to the expression of their corresponding vehicle group at the same time point,
	are calculated for each sample. Data are mean± SEM., n= 5: *p<0.05, **p<0.01, significantly different from vehicle in unpaired t-test with Welch’s correction.
	Propsychotic agents; MAP (3 mg/kg, s.c.), PCP (10 mg/kg, s.c.) and MK-801 (1 mg/kg, s.c.).
