# Supplementary material for: Temporal and Spatial Transcriptional Fingerprints by Antipsychotic or Propsychotic Drugs in Mouse Brain
Source: PLoS One. 2015 Feb 18;10(2):e0118510. doi: 10.1371/journal.pone.0118510 (PMC4334909; doi:10.1371/journal.pone.0118510)
Supplement: S6 Table — Fold changes in gene expression, normalized to cyclophilin A (Ppia) and relative to the expression of their corresponding vehicle group at a dose of 0 mg/kg, are calculated for each sample. Data are mean± SEM., n = 5: #p<0.025, significantly different from vehicle in Williams’ test. Propsychotic agents; MAP (1 hr treatment, 1 mg/kg to 10 mg/kg, s.c.), PCP (1 hr treatment, 1 mg/kg to 10 mg/kg, s.c.), MK-801 (1 hr treatment, 0.1 mg/kg to 3 mg/kg, s.c.). (XLSX) [file pone.0118510.s007.xlsx]

## Sheet: S6 Table
	S6 Table. Fold changes of dose-response gene expression profiling by treatment of propsychotic agents.
	Prefrontal Cortex
		MAP (1hr treatment, s.c.)											PCP (1hr treatment, s.c.)																	MK-801 (1hr treatment, s.c.)
	Conc (mg/kg)	1			3			10					1			2			3			5			10					0.1			0.3			1			3
	c-fos	1.76834	±	0.184375	2.82482	±	0.132184	7.75709	±	0.892731			0.975405	±	0.0726621	1.13386	±	0.148042	1.63383	±	0.300503	1.78936	±	0.199819	2.08315	±	0.172931			1.389	±	0.18971	2.111	±	0.18415	1.261	±	0.23556	1.027	±	0.15915
	Arc	1.59846	±	0.201287	2.11992	±	0.309526	2.73398	±	0.234189			1.22464	±	0.138005	1.10469	±	0.196528	1.25808	±	0.183115	1.10957	±	0.156294	0.959721	±	0.0992135			1.109	±	0.1356	1	±	0.12543	0.71	±	0.09914	0.686	±	0.10539
	Egr1	1.13398	±	0.119263	1.28975	±	0.10033	1.77982	±	0.211018			0.974291	±	0.13657	0.94099	±	0.164945	0.998314	±	0.18222	0.840597	±	0.0727968	0.802403	±	0.0788677			0.91	±	0.07183	0.905	±	0.07996	0.786	±	0.13142	0.725	±	0.08689
	Egr2	1.55483	±	0.277052	2.36406	±	0.192151	5.03243	±	0.656597			0.765829	±	0.141565	0.670115	±	0.208021	0.74675	±	0.206744	0.602004	±	0.116882	0.61195	±	0.119006			0.947	±	0.15905	0.759	±	0.0647	0.532	±	0.10218	0.577	±	0.11457
	Egr3	0.997808	±	0.0513872	1.05178	±	0.0794574	1.27219	±	0.139452			1.10028	±	0.0851996	1.06214	±	0.0835285	1.08351	±	0.144568	0.902762	±	0.0548796	0.924693	±	0.0745452			0.978	±	0.11605	1.007	±	0.12688	0.778	±	0.09188	0.745	±	0.05891
	Sgk1	0.990678	±	0.0810665	0.999892	±	0.0453143	1.22331	±	0.0457079			1.02531	±	0.0957263	0.97008	±	0.114632	1.22428	±	0.0525524	1.31979	±	0.0653333	1.37816	±	0.0913826			0.978	±	0.03869	1.106	±	0.09199	1.058	±	0.10159	1.225	±	0.04616
	Ccn1	2.17958	±	0.121493	3.99579	±	0.107718	10.4433	±	0.602173			1.20054	±	0.157735	1.58457	±	0.278452	2.09975	±	0.200519	2.92307	±	0.253003	3.9772	±	0.213367			1.834	±	0.26324	3.751	±	0.43518	2.582	±	0.27579	2.784	±	0.47099
	Nucleus Accumbens
		MAP (1hr treatment, s.c.)											PCP (1hr treatment, s.c.)																	MK-801 (1hr treatment, s.c.)
	Conc (mg/kg)	1			3			10					1			2			3			5			10					0.1			0.3			1			3
	c-fos	1.99137	±	0.148876	3.53157	±	0.28642	8.99405	±	1.40755			1.03931	±	0.112408	1.60025	±	0.259612	1.93743	±	0.251062	3.49353	±	0.715209	4.48399	±	0.282247			2.293	±	0.45966	3.954	±	0.74052	4.577	±	0.8577	3.488	±	0.34796
	Arc	1.58406	±	0.226869	1.87729	±	0.189408	2.98628	±	0.413681			1.06527	±	0.0588003	0.969823	±	0.0526438	1.05301	±	0.0891369	1.12465	±	0.203389	0.804718	±	0.088255			1.252	±	0.20852	1.136	±	0.13982	0.939	±	0.1018	1.035	±	0.07551
	Egr1	1.24574	±	0.0335318	1.28463	±	0.0773198	1.67583	±	0.241812			0.940301	±	0.0474916	0.900389	±	0.0648439	0.894444	±	0.0986711	0.910763	±	0.0612615	1.02128	±	0.0175504			1.149	±	0.15774	1.156	±	0.17012	1.086	±	0.10853	1.031	±	0.02337
	Egr2	1.65782	±	0.169211	2.53673	±	0.343331	6.22445	±	1.89274			0.948609	±	0.114248	0.786382	±	0.111845	0.595958	±	0.0176324	0.620837	±	0.051038	0.635238	±	0.0386185			1.257	±	0.36778	0.935	±	0.18651	0.879	±	0.10524	0.649	±	0.08062
	Egr3	1.10845	±	0.0585656	1.22345	±	0.109456	1.5448	±	0.271218			0.962678	±	0.0548057	0.879025	±	0.0633619	0.866577	±	0.0696185	0.834796	±	0.0392327	0.770351	±	0.0694714			1.281	±	0.23426	1.097	±	0.18239	1.168	±	0.10681	1.129	±	0.06362
	Sgk1	1.02388	±	0.125328	0.837317	±	0.101627	0.936431	±	0.0698566			0.947071	±	0.116888	0.952447	±	0.135371	1.13196	±	0.0373768	1.36143	±	0.165771	1.29576	±	0.107867			1.175	±	0.12923	1.411	±	0.20501	1.57	±	0.13083	1.727	±	0.1973
	Ccn1	1.5787	±	0.151226	2.4928	±	0.123933	4.52826	±	0.30372			1.00211	±	0.103059	1.17441	±	0.157375	1.69389	±	0.244945	2.76176	±	0.32697	2.89821	±	0.165122			2.795	±	0.53163	4.458	±	0.24801	4.171	±	0.42473	4.524	±	0.65055
	Striatum
		MAP (1hr treatment, s.c.)											PCP (1hr treatment, s.c.)																	MK-801 (1hr treatment, s.c.)
	Conc (mg/kg)	1			3			10					1			2			3			5			10					0.1			0.3			1			3
	c-fos	3.77578	±	0.411337	8.18517	±	0.27421	30.0143	±	1.4746			0.871604	±	0.109713	0.956584	±	0.14341	1.3022	±	0.199323	3.21814	±	0.879181	5.49573	±	0.528393			1.131	±	0.24599	2.225	±	0.36379	3.057	±	0.48514	1.858	±	0.3101
	Arc	2.6864	±	0.4793	3.49727	±	0.39761	6.95337	±	0.592419			0.837949	±	0.0600458	0.824612	±	0.0528929	0.684156	±	0.048535	0.720434	±	0.0906255	0.655454	±	0.113238			1.069	±	0.16105	0.839	±	0.14377	1.036	±	0.16297	0.651	±	0.11972
	Egr1	1.32341	±	0.0923804	1.61471	±	0.146958	2.18619	±	0.182826			1.02592	±	0.0717465	0.9828	±	0.108097	0.811075	±	0.0260656	0.858155	±	0.0715021	0.885773	±	0.0514068			1.042	±	0.14317	0.952	±	0.17636	1.258	±	0.173	0.927	±	0.15563
	Egr2	2.77898	±	0.542308	5.03086	±	0.285988	12.81	±	1.03658			0.909641	±	0.141422	0.880173	±	0.146658	0.632062	±	0.0736226	0.591434	±	0.0959573	0.560536	±	0.0881089			0.837	±	0.0942	0.788	±	0.18298	0.791	±	0.1497	0.616	±	0.13613
	Egr3	1.08573	±	0.0444925	1.36795	±	0.111075	1.89369	±	0.23501			1.06526	±	0.0568938	1.09133	±	0.073942	0.9213	±	0.023081	0.97095	±	0.137193	0.864059	±	0.0675577			1.262	±	0.17252	1.12	±	0.21336	1.472	±	0.18718	1.273	±	0.19692
	Sgk1	1.15896	±	0.0512888	1.04256	±	0.0643773	1.26129	±	0.117068			0.925508	±	0.129715	0.970038	±	0.0979481	1.08803	±	0.0789597	1.367	±	0.0771065	1.27139	±	0.0901924			1.479	±	0.27748	1.403	±	0.17131	2.027	±	0.14463	1.922	±	0.30197
	Ccn1	1.16572	±	0.0710958	1.96971	±	0.127566	2.25104	±	0.0751354			0.994721	±	0.0315181	1.37925	±	0.151327	1.72926	±	0.160013	3.17668	±	0.195221	3.62607	±	0.367518			2.61	±	0.78843	3.274	±	0.47252	3.696	±	0.21362	2.307	±	0.26635
	Hippocampus
		MAP (1hr treatment, s.c.)											PCP (1hr treatment, s.c.)																	MK-801 (1hr treatment, s.c.)
	Conc (mg/kg)	1			3			10					1			2			3			5			10					0.1			0.3			1			3
	c-fos	2.79601	±	0.409395	5.0425	±	0.326087	4.76054	±	0.271059			0.71375	±	0.0508532	0.985275	±	0.099326	1.03966	±	0.132722	2.30719	±	0.41512	3.27367	±	0.0808479			1.939	±	0.36487	3.019	±	0.19851	3.365	±	0.46724	3.47	±	0.62989
	Arc	1.52808	±	0.250342	1.38453	±	0.148569	1.04583	±	0.133263			1.04763	±	0.075819	1.12885	±	0.0709369	1.14287	±	0.118009	1.37388	±	0.135259	1.30952	±	0.208252			1.406	±	0.10563	1.534	±	0.18947	1.199	±	0.18308	0.883	±	0.15015
	Egr1	1.27137	±	0.13277	1.00975	±	0.0711826	1.00289	±	0.0851625			0.982712	±	0.0490137	0.994223	±	0.0566502	1.03129	±	0.133387	1.0545	±	0.0807439	1.34674	±	0.0378571			1.281	±	0.10363	1.305	±	0.22515	1.42	±	0.21653	1.195	±	0.23341
	Egr2	1.92243	±	0.324171	2.37945	±	0.215138	1.35494	±	0.133765			0.8446	±	0.0579984	0.969762	±	0.134483	1.01692	±	0.166927	1.81658	±	0.419009	2.55413	±	0.399212			1.838	±	0.28389	1.666	±	0.30357	1.139	±	0.2542	1.262	±	0.31477
	Egr3	1.04684	±	0.0498792	0.884694	±	0.0670611	0.928661	±	0.0867976			0.996004	±	0.0612673	0.977978	±	0.0398507	0.977114	±	0.101908	0.858778	±	0.085184	0.898392	±	0.0729354			1.37	±	0.1062	1.35	±	0.18543	1.544	±	0.2443	1.343	±	0.26751
	Sgk1	1.17891	±	0.13461	0.976782	±	0.0562935	1.12439	±	0.0360832			0.948826	±	0.119353	0.839892	±	0.165038	1.23589	±	0.210295	1.14916	±	0.137434	1.45413	±	0.121984			1.41	±	0.17619	1.266	±	0.09267	1.696	±	0.18348	1.715	±	0.19467
	Ccn1	2.99033	±	0.382108	5.5265	±	0.385235	5.25298	±	0.387312			0.98993	±	0.124456	0.947091	±	0.120963	1.1932	±	0.228213	1.99778	±	0.354922	2.74923	±	0.14207			2.228	±	0.66412	4.548	±	0.40513	5.48	±	0.43556	6.231	±	1.11978
	Fold changes in gene expression, normalized to cyclophilin A (Ppia) and relative to the expression of their corresponding vehicle group at a dose of 0 mg/kg,
	are calculated for each sample. Data are mean± SEM., n= 5: #p<0.025, significantly different from vehicle in Williams’ test. Propsychotic agents;
	MAP (1 hr treatment, 1 mg/kg to 10 mg/kg, s.c.), PCP (1 hr treatment, 1 mg/kg to 10 mg/kg, s.c.), MK-801 (1 hr treatment, 0.1 mg/kg to 3 mg/kg, s.c.).
